# Supplementary material
Source: PubMed Central journal article supplement (PMC4118495)
Supplement: supp_WNL.0000000000000498_Figure_e-1.pdf [file supp_WNL.0000000000000498_Figure_e-1.pdf]

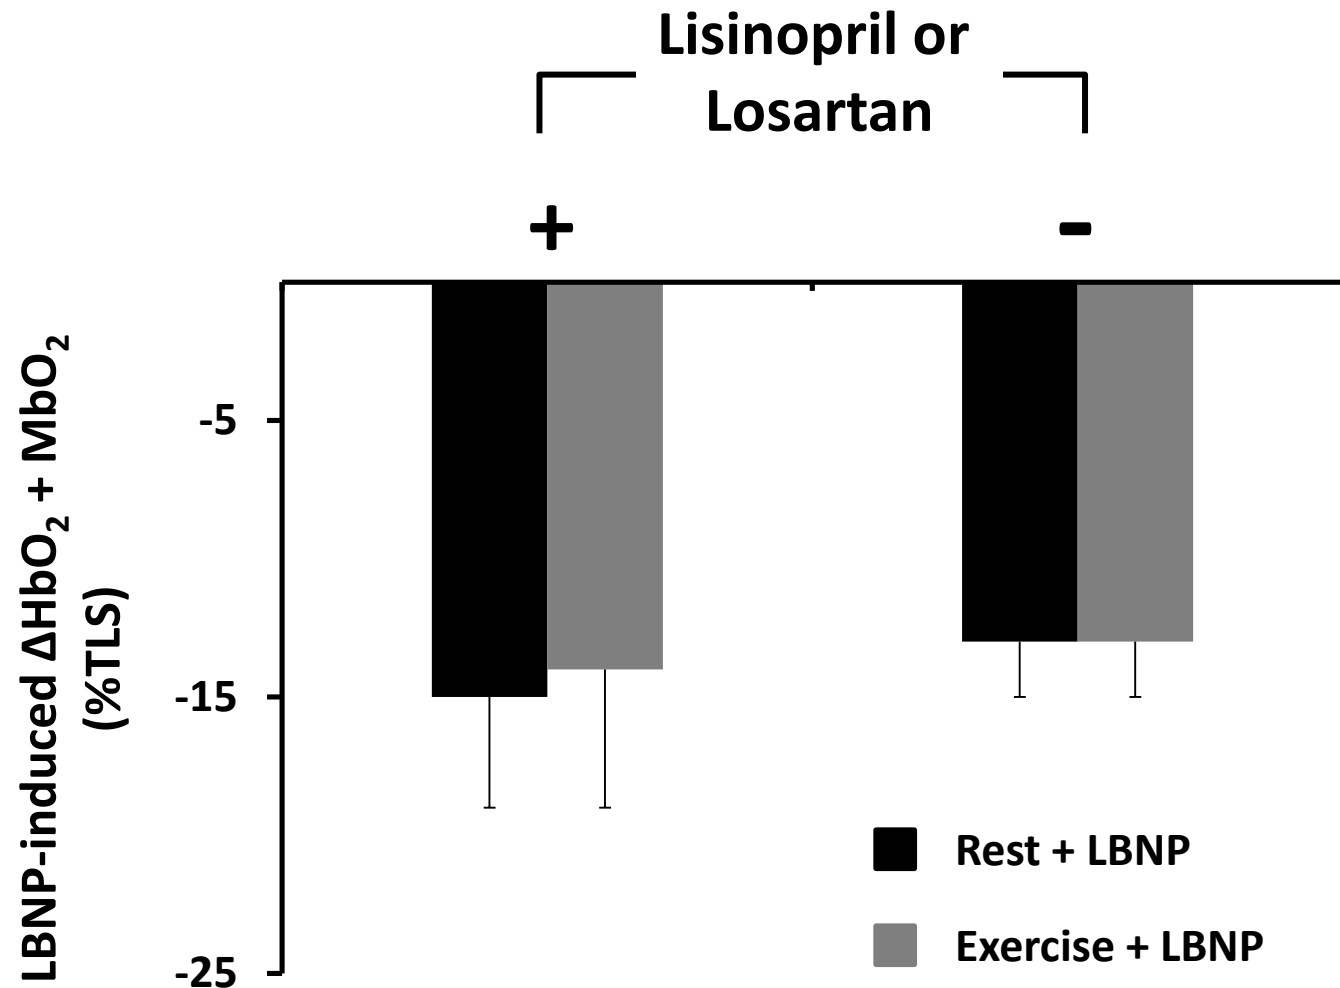

**Figure e-1.** Prophylactic cardiovascular treatment with either an angiotensin converting enzyme inhibitor (lisinopril,  $n = 4$ ) or an angiotensin receptor blocker (losartan,  $n = 1$ ) does not rescue functional sympatholysis in DMD, as demonstrated by a similar impairment exercise-induced attenuation of reflex vasoconstriction during LBNP compared to patients not undergoing prophylactic treatment ( $n = 5$ ). Data expressed as a percentage of the total labile signal (TLS) (mean  $\pm$  SE).
