# Supplementary material
Source: PubMed Central journal article supplement (PMC4118495)
Supplement: supp_WNL.0000000000000498_Figure_e-2.pdf [file supp_WNL.0000000000000498_Figure_e-2.pdf]

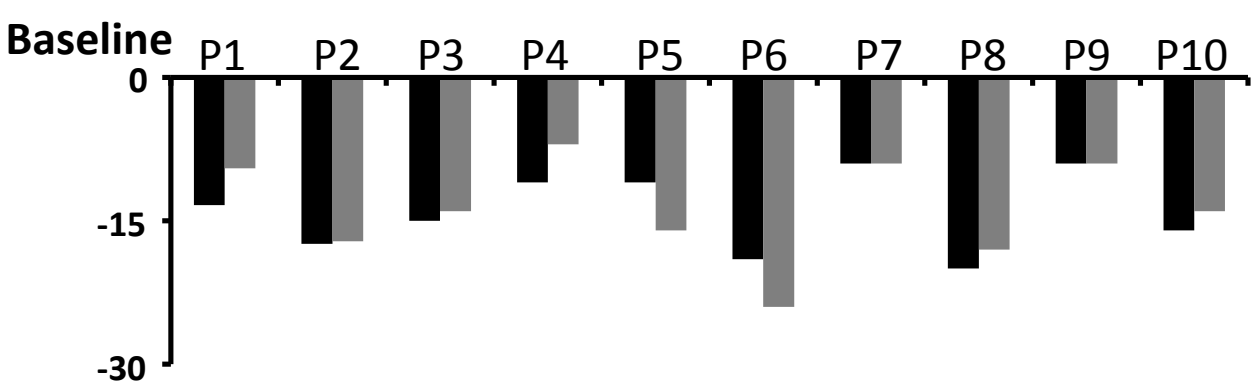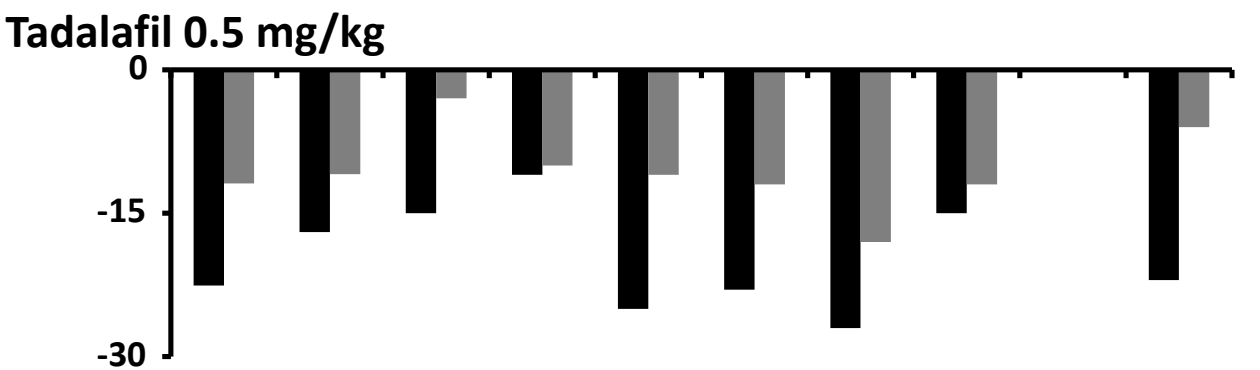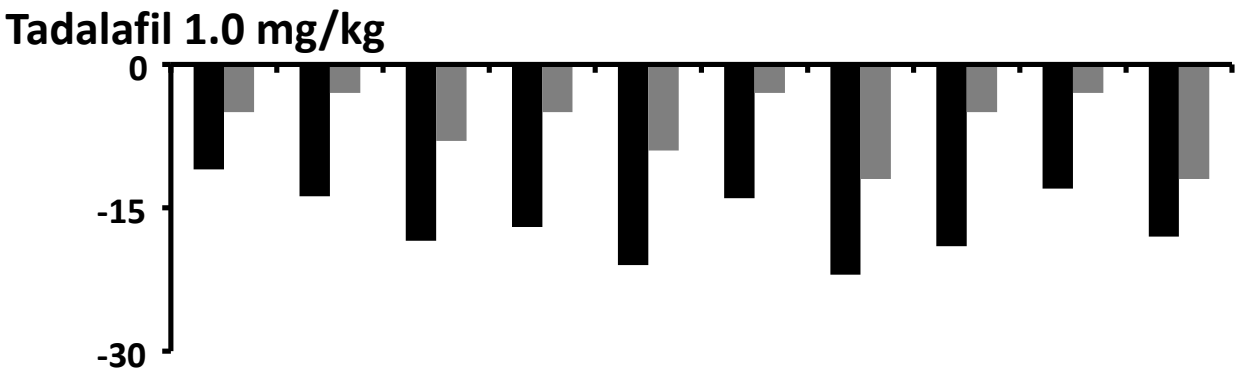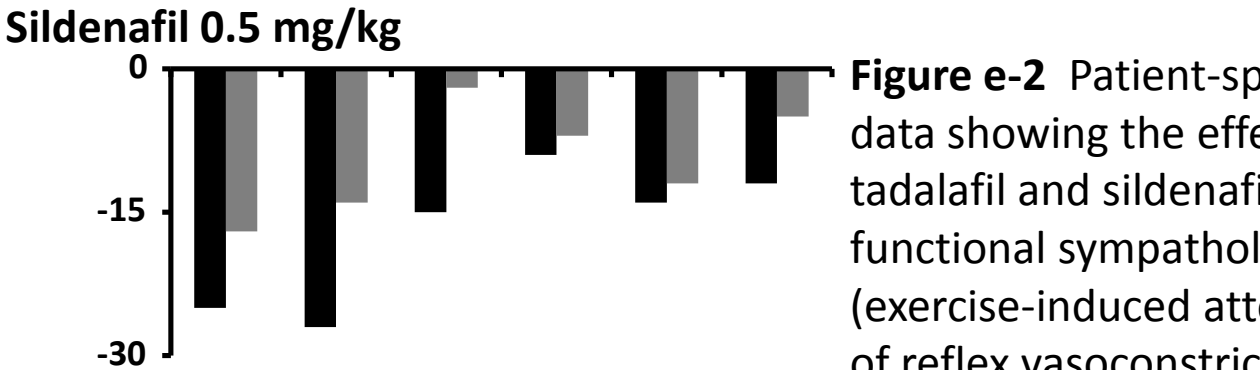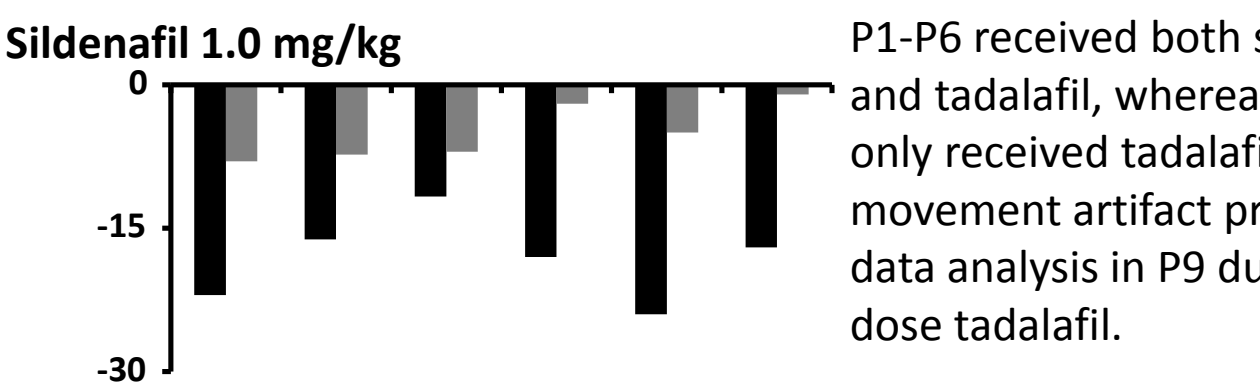

**Figure e-2** Patient-specific data showing the effect of tadalafil and sildenafil on functional sympatholysis (exercise-induced attenuation of reflex vasoconstriction). P1-P6 received both sildenafil and tadalafil, whereas P7-P10 only received tadalafil. Severe movement artifact prevented data analysis in P9 during low dose tadalafil.
