# Supplementary material
Source: PubMed Central journal article supplement (PMC4118495)
Supplement: supp_WNL.0000000000000498_Figure_e-3.pdf [file supp_WNL.0000000000000498_Figure_e-3.pdf]

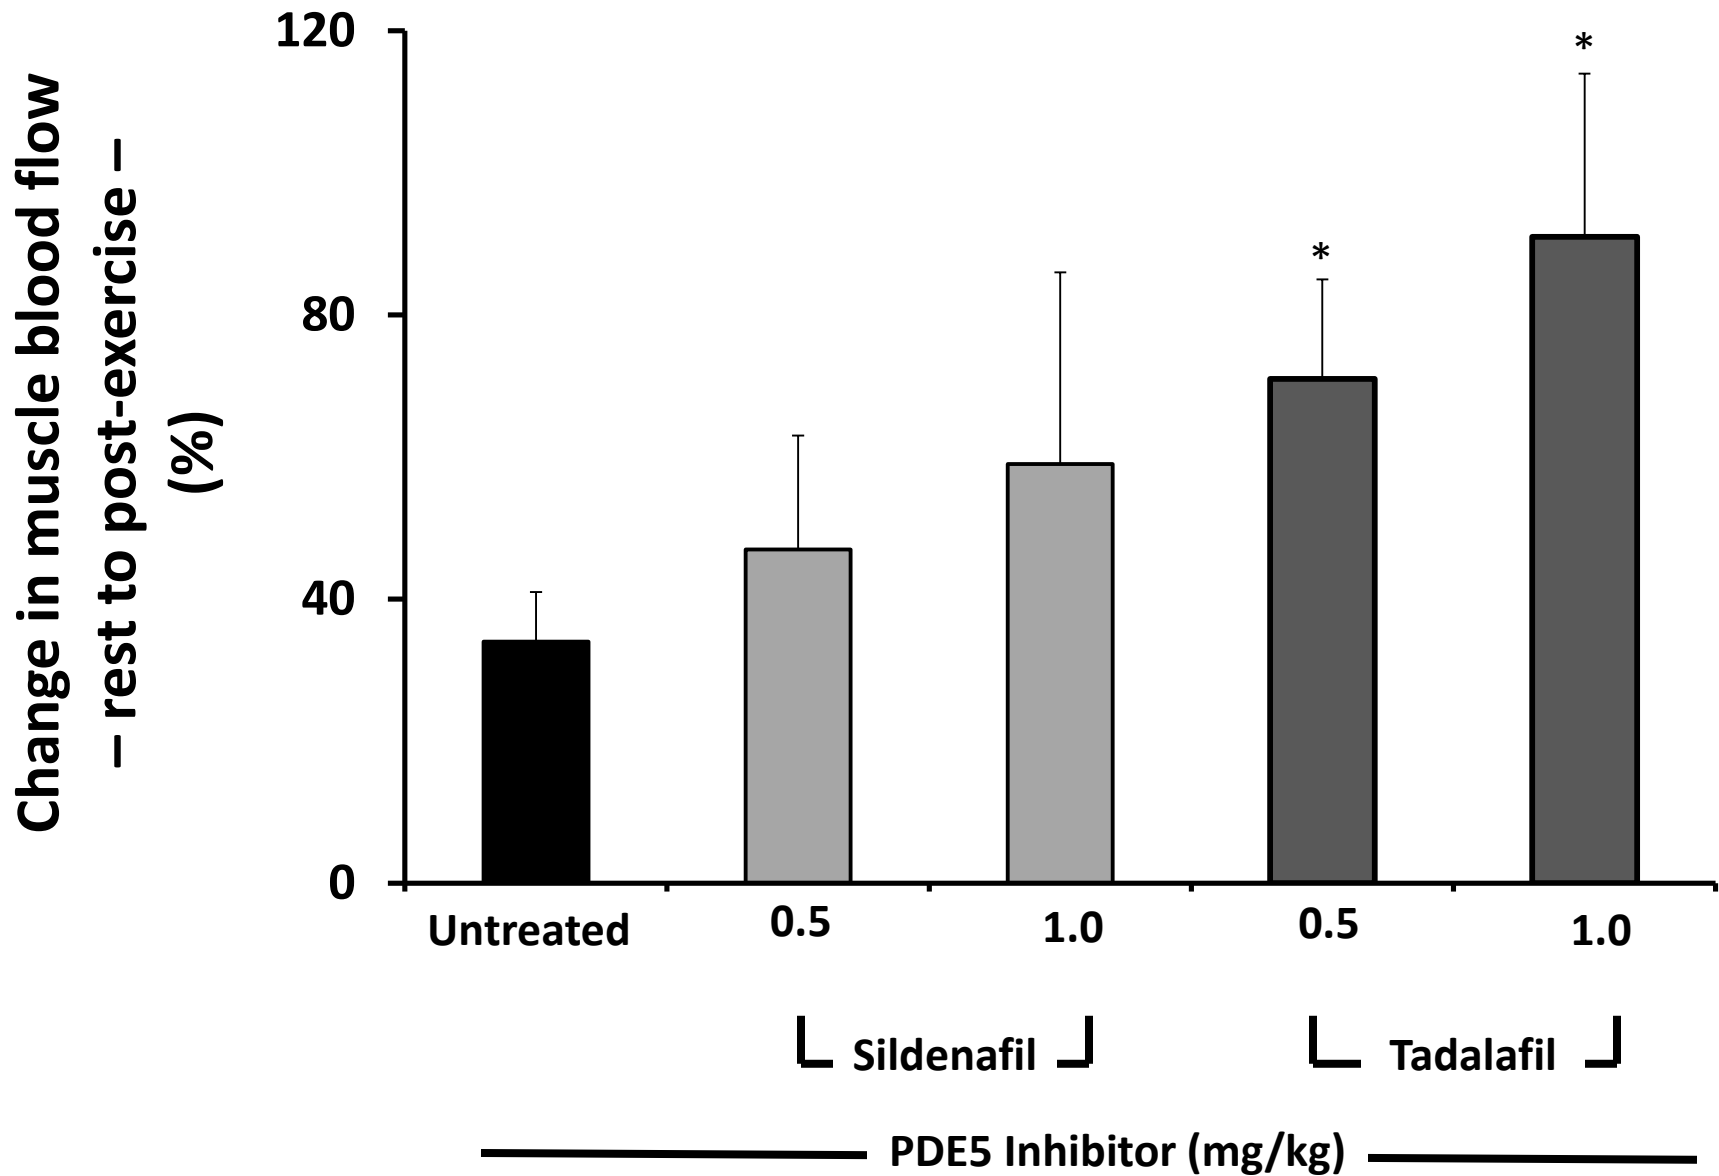

**Figure e-3.** Post-exercise hyperemia is restored by either sildenafil or tadalafil (n = 6). Data expressed as a percent change from rest to post-exercise (mean  $\pm$  SE). \*P < 0.05, compared to untreated.
