# Supplementary material
Source: PubMed Central journal article supplement (PMC4118495)
Supplement: supp_WNL.0000000000000498_Figure_e-4.pdf [file supp_WNL.0000000000000498_Figure_e-4.pdf]

PDE5 Inhibitor

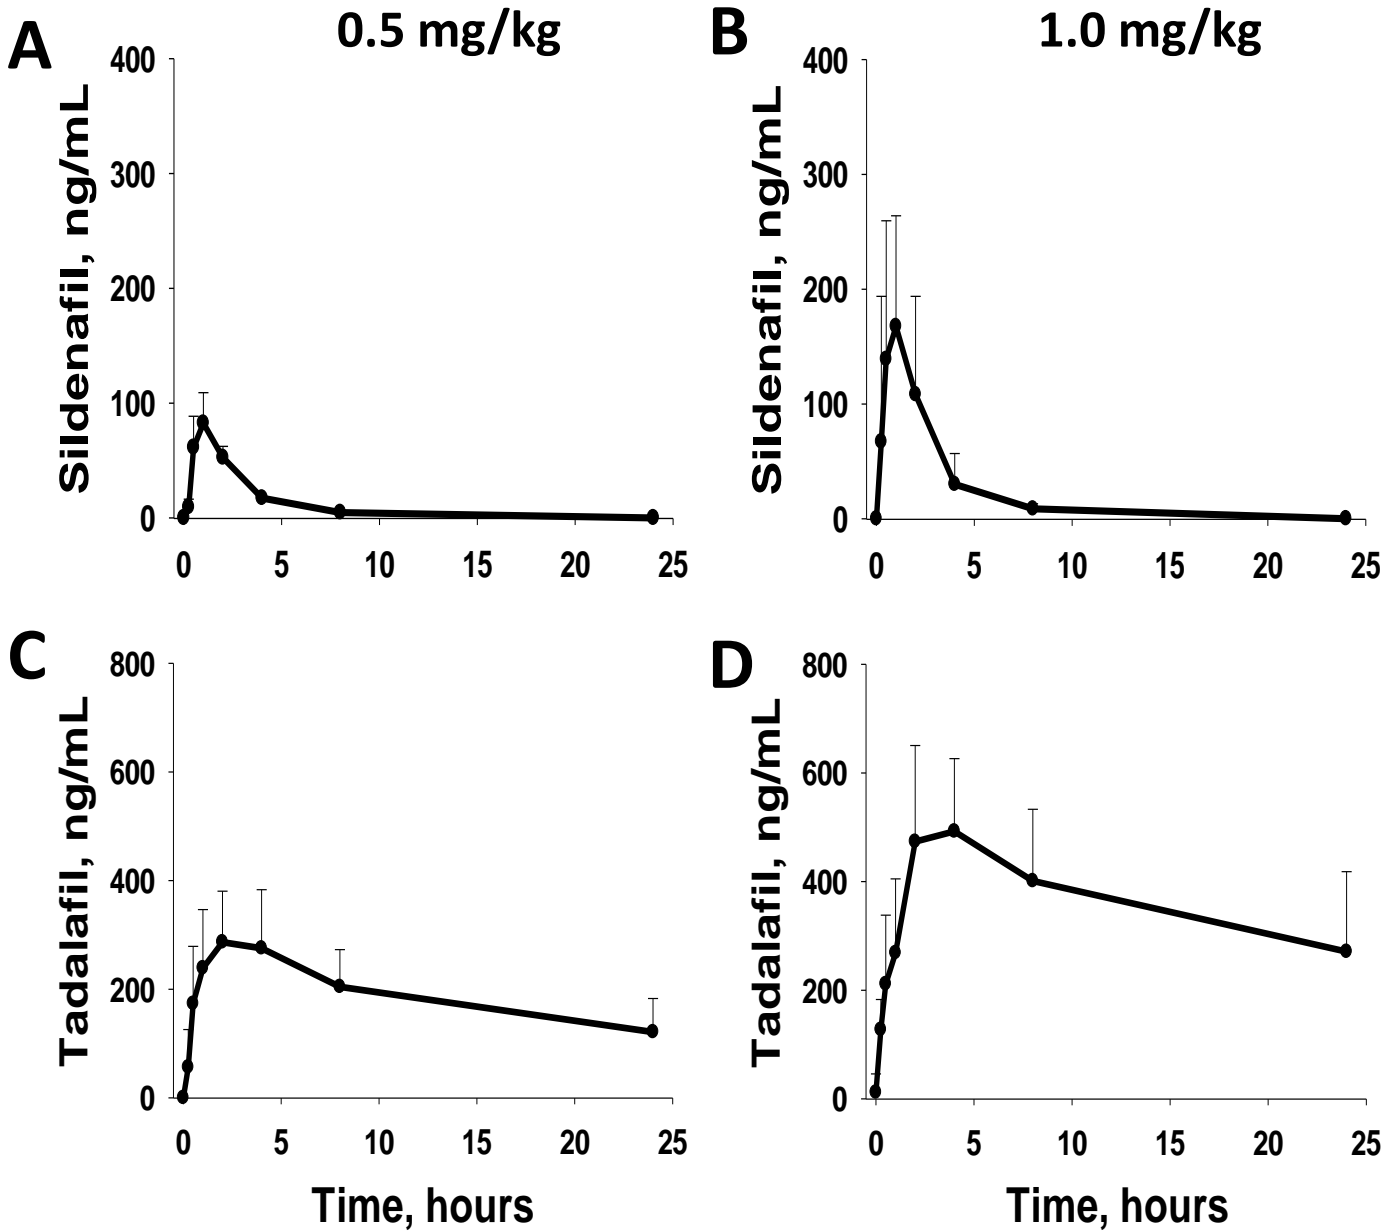

**Figure e-4.** Twenty-four hour pharmacokinetic data in 9 boys with DMD, treated with two different phosphodiesterase (PDE) 5 inhibitors – sildenafil (A and B) and tadalafil (C and D) – with the dose starting at 0.5 mg/kg body weight (left), and escalating to 1.0 mg/kg body weight (right) for each drug. To allow for adequate washout, each drug was separated by at least two-weeks. Data reported as mean  $\pm$  SE.
